# Supplementary material for: Improvement of Drought Tolerance by Exogenous Spermidine in Germinating Wheat (Triticum aestivum L.) Plants Is Accompanied with Changes in Metabolite Composition
Source: MDPI journal article supplement (doi:10.3390/ijms23169047), 2022-08-12

**Poor Germination**

**Drought stress (-4 Mpa)  
(0 Spd)**

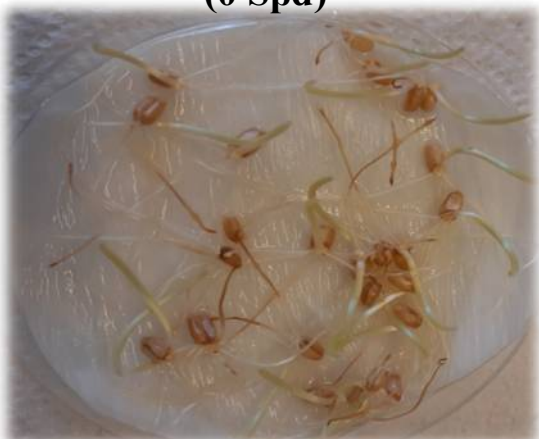

**Drought stress (-4 Mpa)  
(10 mg L<sup>-1</sup> Spd)**

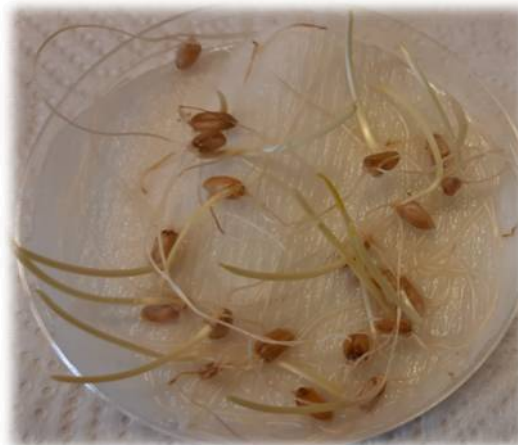

**Better Germination**

**Drought stress (-4 Mpa)  
(20 mg L<sup>-1</sup> Spd)**

**Poor Germination**

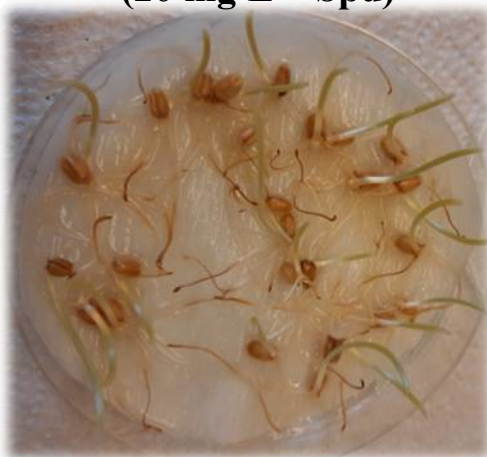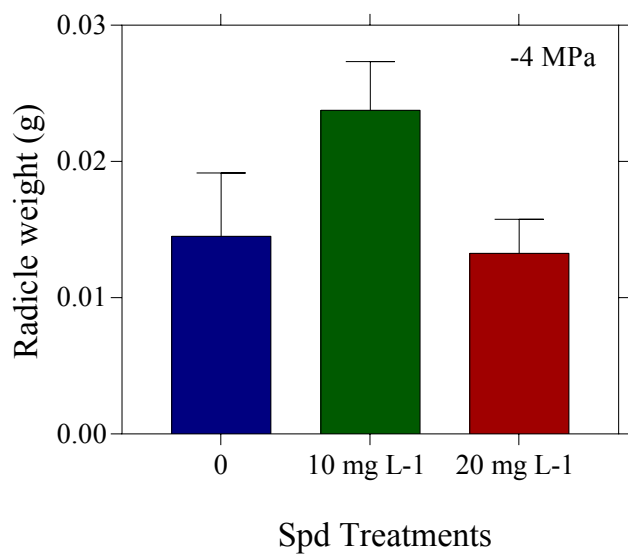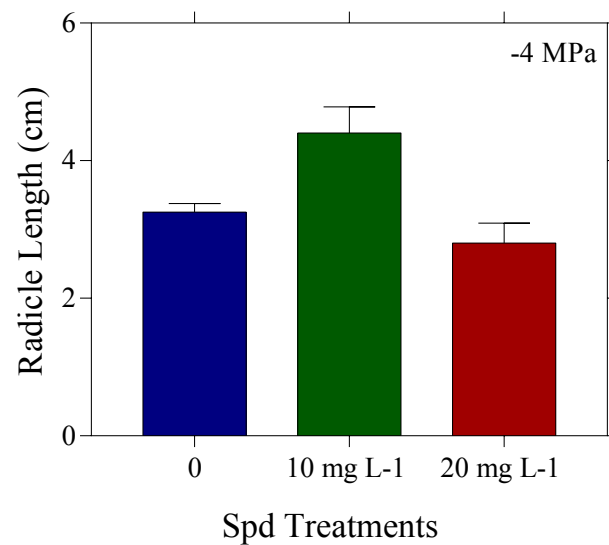

Supplement: s1 [file s1]
